# Supplementary material for: Adiponectin receptor PAQR-2 signaling senses low temperature to promote C. elegans longevity by regulating autophagy
Source: PubMed Central journal article supplement (PMC6565724; doi:10.1038/s41467-019-10475-8), 2019-06-13
Supplement: 41467_2019_10475_MOESM1_ESM.pdf [file 41467_2019_10475_MOESM1_ESM.pdf]

## **Supplementary Information**

**Adiponectin receptor PAQR-2 signaling senses low temperature to  
promote *C. elegans* longevity by regulating autophagy**

Chen. *et al*

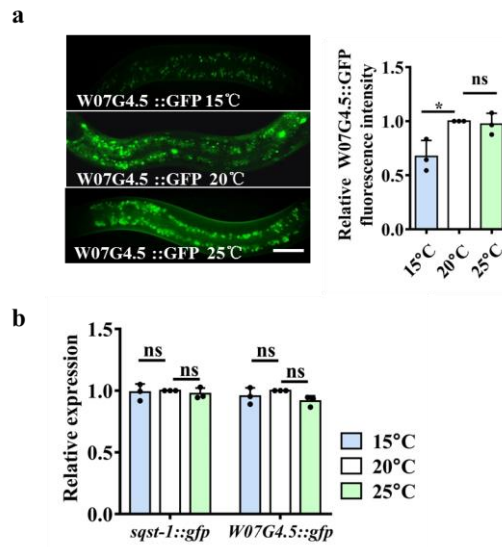

**Supplementary Figure 1. The effect of low temperature on the expression of *sqst-1* and *W07G4.5* in worms.** Day 1 adult worms were grown at 15°C, 20°C, and 25°C for 24 h, respectively. (a) The expression of W07G4.5::GFP in adult worms. The right panel shows quantification of GFP levels. \* $P < 0.05$ , 15°C versus 20°C. Scale bars: 50  $\mu\text{m}$ . These results are means  $\pm$  SD of three independent experiments (n = 50-55 worms per experiment). (b) The mRNA levels of *sqst-1::gfp* and *W07G4.5::gfp* in worms at 15°C, 20°C and 25°C. These results are means  $\pm$  SD (n = 3). ns, not significant.  $p$ -Values throughout were calculated using a one-way ANOVA followed by a Student-Newman-Keuls test.

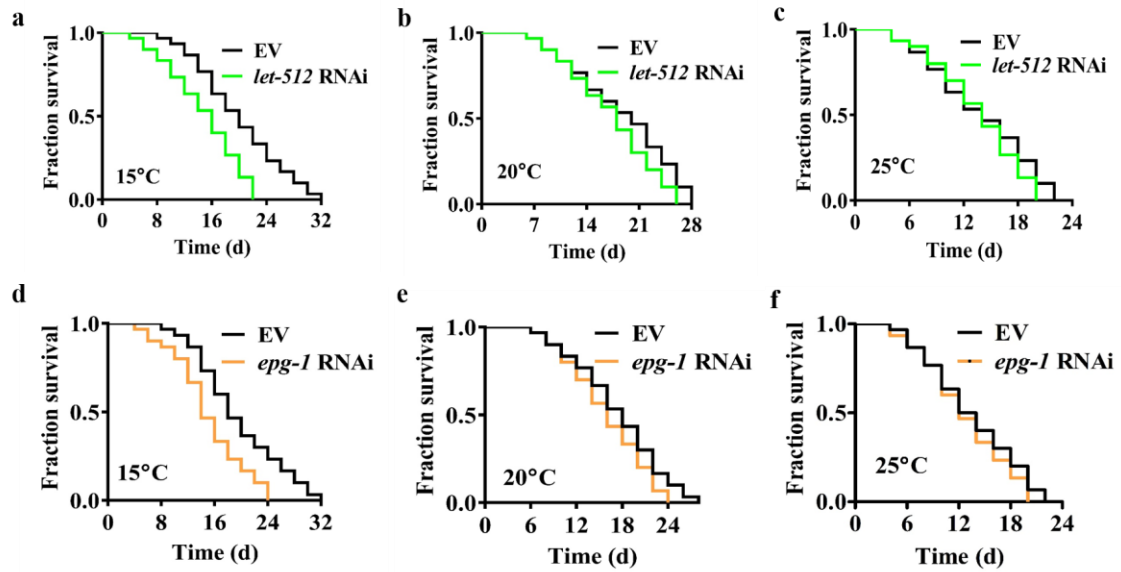

**Supplementary Figure 2. Knockdown of *let-512* or *epg-1* by RNAi shortens lifespan of worms at low temperature.** (a) 15°C;  $P < 0.01$  versus wild type animals (N2) with empty vector (EV); (b) 20°C; (c) 25°C. Not significant, versus N2 with EV. (d) 15°C;  $P < 0.01$  versus N2 with EV; (e) 20°C; (f) 25°C. Not significant, relative to N2 with EV.  $p$ -Values throughout were calculated using log-rank test. See Supplementary Data 1 for details.

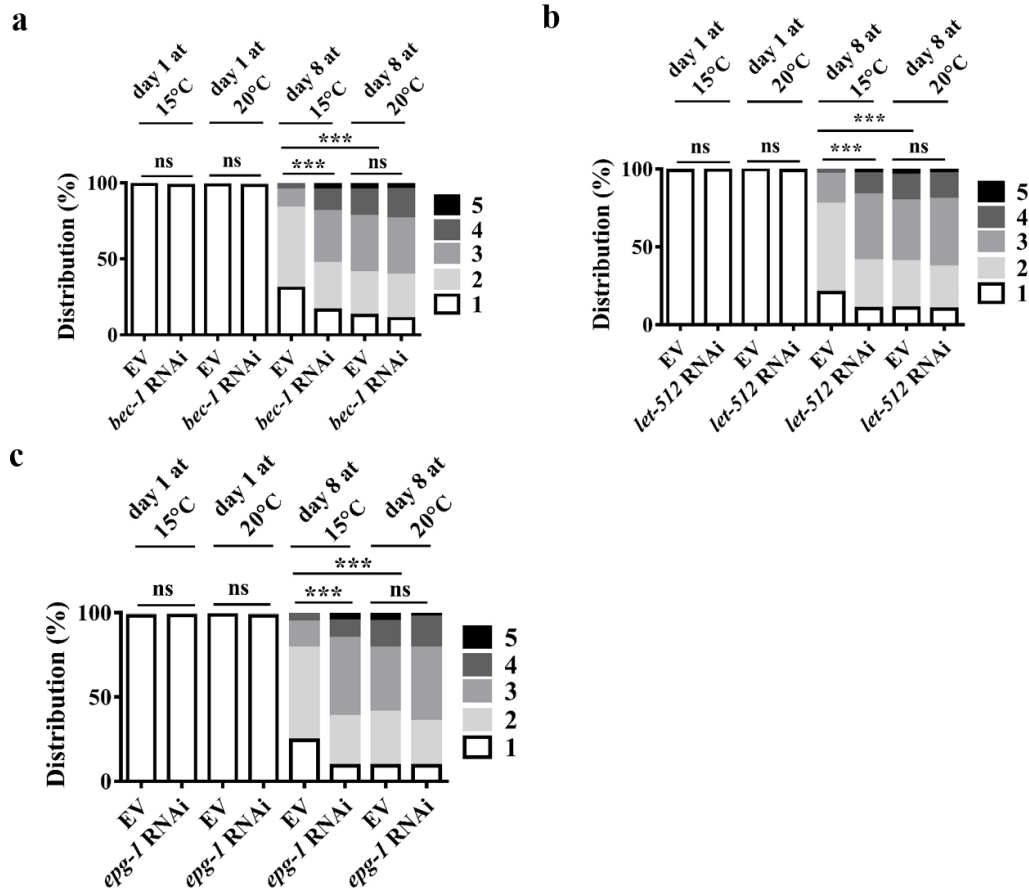

**Supplementary Figure 3. Knockdown of *bec-1*, or *let-512*, or *epg-1* by RNAi aggravates pharyngeal deterioration at low temperature.** (a-c) Classification of pharynx structure in adult worms subjected to *bec-1* (a), *let-512* (b), and *epg-1* (c) RNAi at days 1 and 8 at 15°C and 20°C. For each time point, three independent experiments were carried out. The percentages of pharyngeal degeneration were calculated in total worms (n = 20-30 worms each experiment). \*\*\* $P < 0.001$ , eight-day-old worms with empty vector (EV) at 15°C versus eight-day-old worms with EV at 20°C, or eight-day-old worms with *bec-1* RNAi at 15°C. ns, not significant.  $p$ -Values were calculated using the Wilcoxon rank sum test.

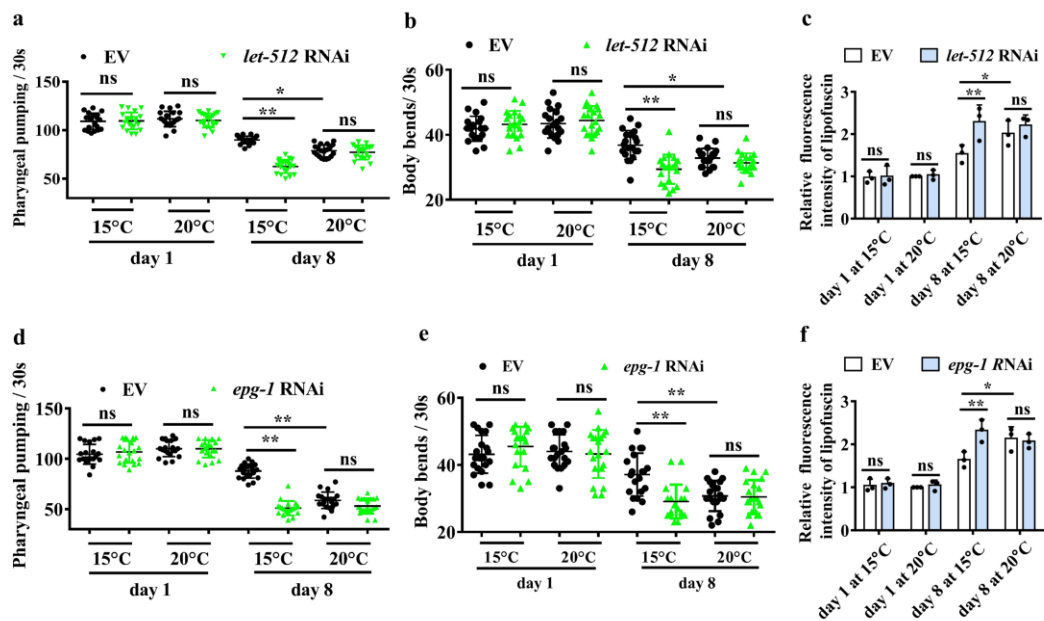

**Supplementary Figure 4. Knockdown of *let-512* and *epg-1* by RNAi aggravates appearance of aging markers at low temperature.** The appearance of aging markers in worms at adults subjected to *let-512* (a-c) and *epg-1* (d-f) RNAi at 15°C and 20°C. (a and d) Pharyngeal pumping; (b and e) Body bending; These results are means  $\pm$  SD (n = 20). \* $P < 0.05$ ; \*\* $P < 0.01$ , eight-day-old worms with empty vector (EV) at 15°C versus eight-day-old worms with EV at 20°C; \*\* $P < 0.01$ , eight-day-old worms with EV at 15°C versus eight-day-old worms with *let-512* or *epg-1* RNAi at 15°C. ns, not significant. Ten of worms were examined per experiment. (c and f) Lipofuscin autofluorescence. These results are means  $\pm$  SD of three independent experiments (n = 30-33 worms per experiment). \* $P < 0.05$ , eight-day-old worms with EV at 15°C versus EV eight-day-old worms with EV at 20°C; \*\* $P < 0.01$ , eight-day-old worms with EV at 15°C versus eight-day-old worms with *let-512* or *epg-1* RNAi at 15°C. ns, not significant. *p*-Values throughout were calculated using a one-way ANOVA followed by a Student-Newman-Keuls test.

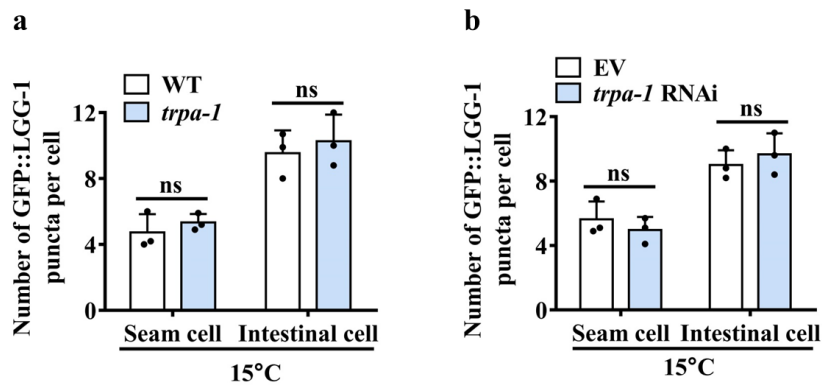

**Supplementary Figure 5. *trpa-1* is not involved in the induction of autophagy at low temperature.** (a) *trpa-1(ok999)* mutants. (b) *trpa-1* RNAi. These results are means  $\pm$  SD of three independent experiments (n = 30-34 worms per experiment). EV, empty vector. ns, not significant. *p*-Values throughout were calculated using a one-way ANOVA followed by a Student-Newman-Keuls test.

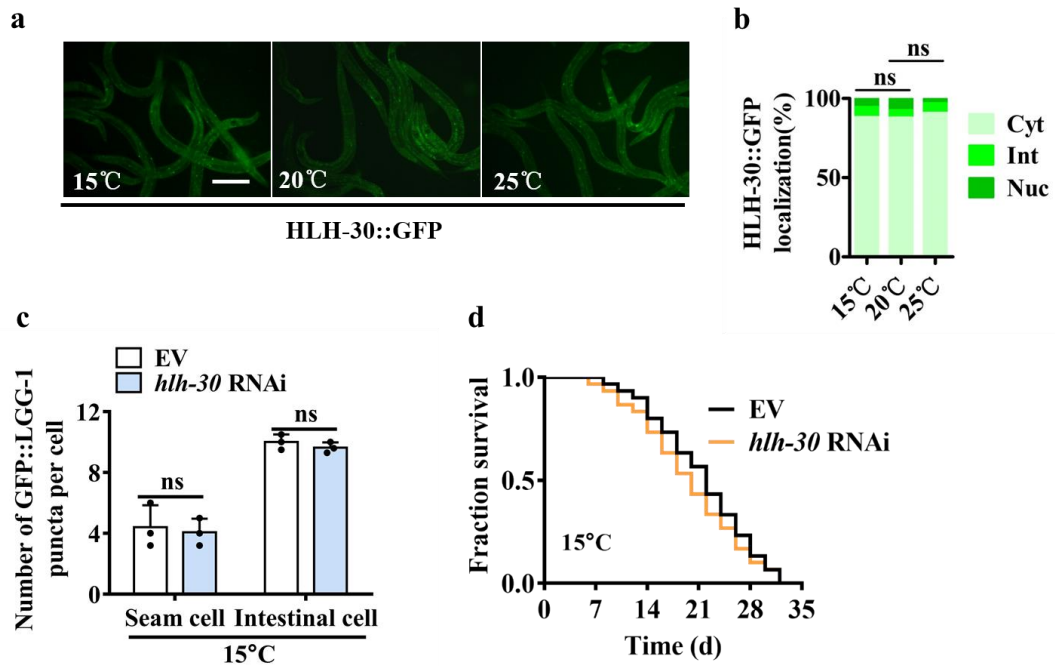

**Supplementary Figure 6. *hhh-30* is not involved in lifespan extension in worms at low temperature.** (a) HLH-30 nuclear localization did not occur in worms at 15°C. Scale bars: 150  $\mu$ m. (b) Quantification of HLH-30 distribution. For each time point, three independent experiments were carried out. The percentages of HLH-30 distribution were calculated in total worms (n = 100-109 worms each experiment). ns, not significant (Wilcoxon rank sum test). (c) Knockdown of *hhh-30* by RNAi did not influence autophagy in worms at 15°C. These results are means  $\pm$  SD of three independent experiments (n = 30-33 worms per experiment). ns, not significant (One-way ANOVA followed by a Student-Newman-Keuls test). EV, empty vector. (d) Knockdown of *hhh-30* by RNAi did not influence lifespan in worms at 15°C. (Log-rank test, not significant, *hhh-30* RNAi versus animals with EV). See Supplementary Data 1 for details.

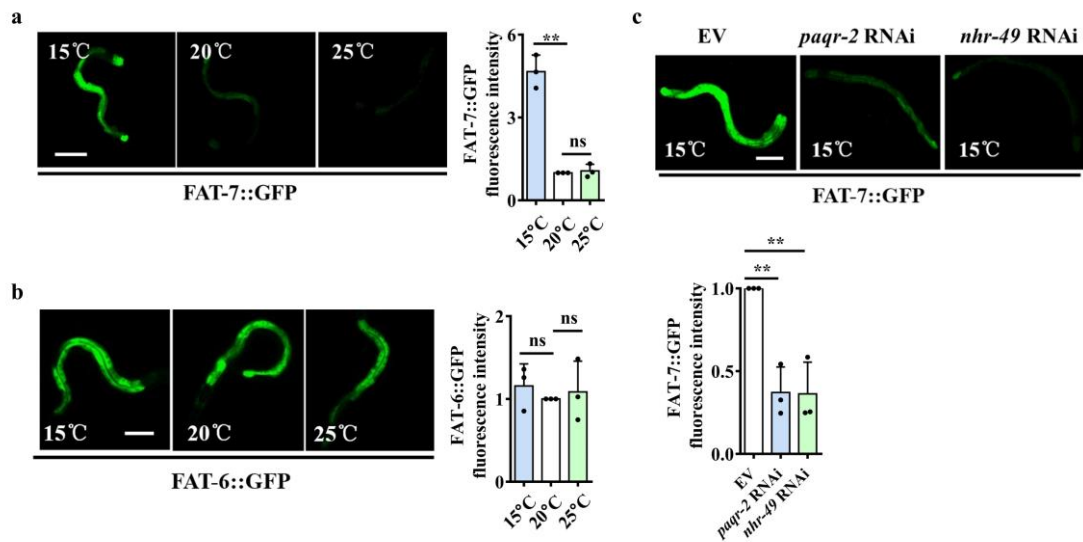

**Supplementary Figure 7. Up-regulation of *fat-7* is mediated by PAQR-2 and NHR-49 at low temperature.** (a) The expression of *fat-7::gfp* (a) was up-regulated in worms at 15 °C, The right panel shows quantification of GFP levels.  $**P < 0.01$ , 15°C versus 20°C. ns, not significant. (b) The expression of *fat-6::gfp* was not altered. The right panel shows quantification of GFP levels. ns, not significant. (c) Knockdown of *paqr-2* and *nhr-49* by RNAi led to a decrease in the expression of *fat-7::gfp* in worm at 15 °C. The lower panel shows quantification of GFP levels.  $**P < 0.01$ , worms with EV versus *paqr-2* or *nhr-49* RNAi at 15°C. These results are means  $\pm$  SD of three independent experiments (n = 100-106 worms per experiment). *p*-Values throughout were calculated using a one-way ANOVA followed by a Student-Newman-Keuls test. Scale bars: 200  $\mu$ m.



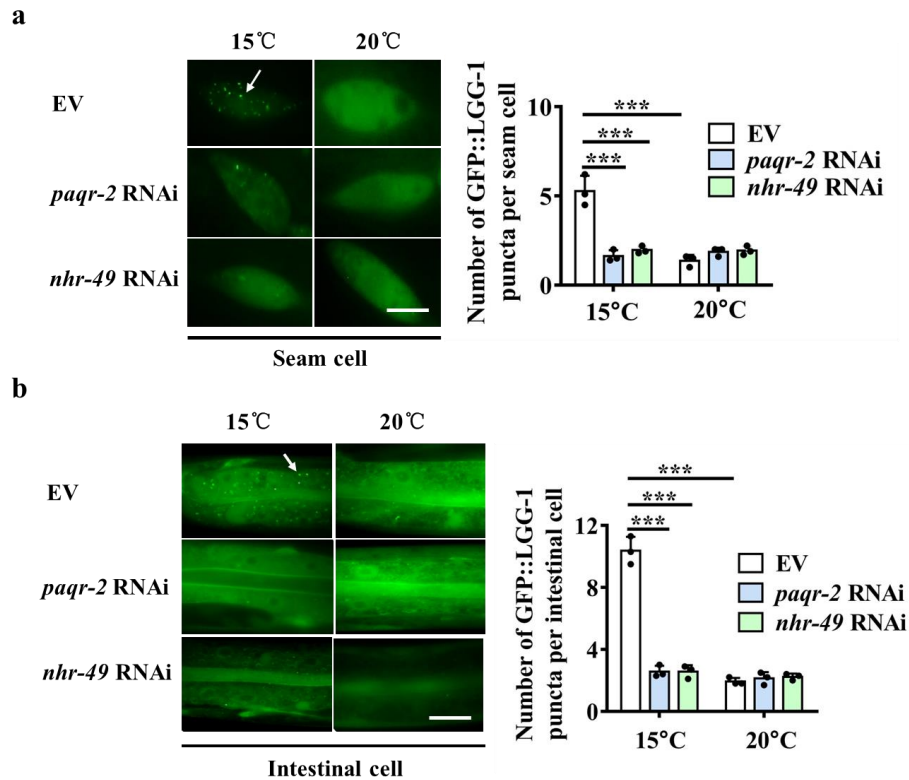

**Supplementary Figure 8. Knockdown of *paqr-2* and *nhr-49* by RNAi suppresses autophagy at low temperature.** (a and b) Representative images of autophagosomes (GFP::LGG-1 puncta) in the seam cells (a) and intestinal cells (b) of worms subjected to *paqr-2* and *nhr-49* RNAi at 15°C and 20°C, respectively. The arrow denotes a representative autophagosome. The numbers of GFP::LGG-1 puncta were counted in the seam cells (a, right panel) and intestinal cells (b, right panel). These results are means  $\pm$  SD of three independent experiments (n = 30-32 worms per experiment). \*\*\*  $P < 0.001$ , worms subjected to RNAi versus those with empty vector (EV) at 15°C or worms with EV at 15°C versus worms with EV at 20°C. *p*-Values throughout were calculated using a one-way ANOVA followed by a Student-Newman-Keuls test. Scale bars: seam cells, 10  $\mu$ m; intestinal cells, 20  $\mu$ m.

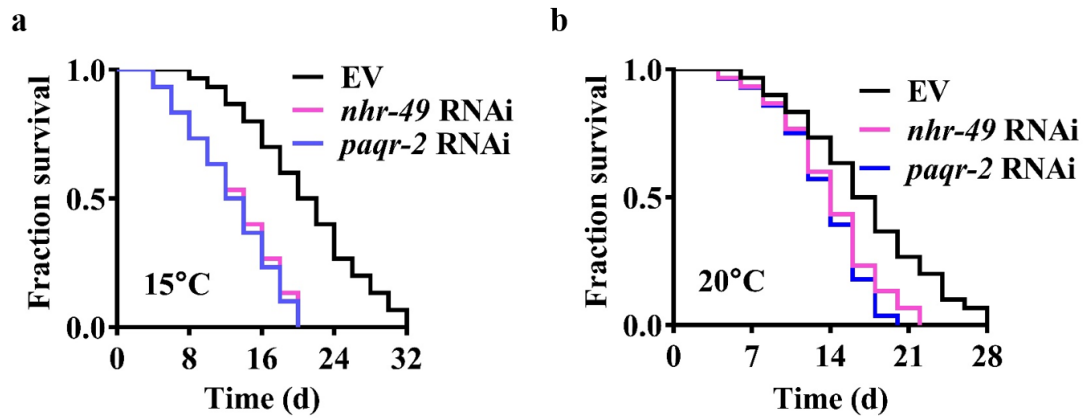

**Supplementary Figure 9. Knockdown of *paqr-2* and *nhr-49* by RNAi shortens lifespan of worms at 15°C and 20°C. (a) 15°C.  $P < 0.001$  versus empty vector (EV). (b) 20°C.  $P < 0.01$  versus EV.  $p$ -Values were calculated using log-rank test. See Supplementary Data 1 for details.**

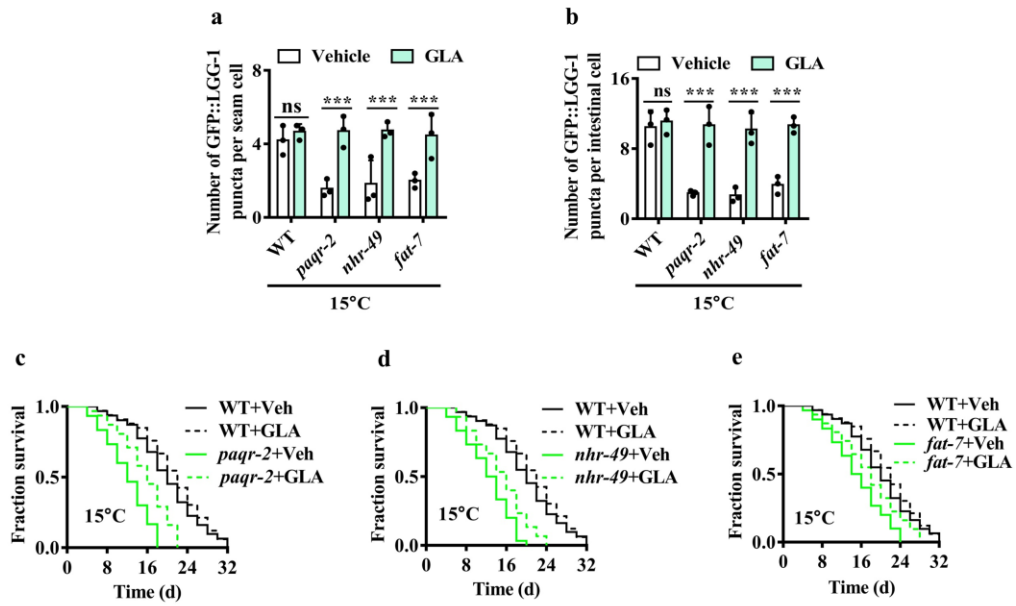

**Supplementary Figure 10.  $\gamma$ -Linolenic acid supplementation restores the activation of autophagy and rescues the short lifespan in *paqr-2(tm3410)*, *nhr-49(nr2041)*, and *fat-7(wa36)* mutants at 15°C.** (a and b) Supplementation with  $\gamma$ -linolenic acid (GLA, 500  $\mu$ M) significantly restored autophagy in both seam cells (a) and intestinal cells (b) in *paqr-2(tm3410)*, *nhr-49(nr2041)*, and *fat-7(wa36)* mutants at 15°C. These results are means  $\pm$  SD of three independent experiments (n = 30-33 worms per experiment). \*\*\*  $P < 0.001$  versus vehicle.  $p$ -Values (a and b) were calculated using a one-way ANOVA followed by a Student-Newman-Keuls test. (c and d) Supplementation with GLA (500  $\mu$ M) partially restored lifespan in *paqr-2(tm3410)* (c) ( $P < 0.001$  versus vehicle) and *nhr-49(nr2041)* (d) ( $P < 0.01$  versus vehicle) at 15°C. Veh, vehicle. (e) Supplementation with GLA (500  $\mu$ M) fully rescued lifespan in *fat-7(wa36)* mutant worms at 15°C ( $P < 0.05$  versus vehicle).  $p$ -Values (c-e) were calculated using log-rank test. See Supplementary Data 1 for details.

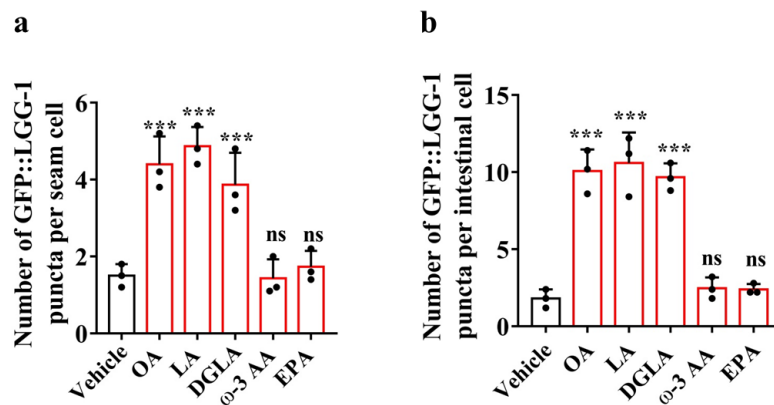

**Supplementary Figure 11. The effect of several unsaturated fatty acids on autophagy in *fat-7(wa36)* mutants at 15°C.** (a and b) Supplementation with oleic acid (OA, 100  $\mu$ M), or linoleic acid (LA, 200  $\mu$ M), or dihomo- $\gamma$ -linolenic acid (DGLA, 500  $\mu$ M), but not  $\omega$ -3 arachidonic acid ( $\omega$ -3 AA, 500  $\mu$ M), or eicosapentaenoic acid (EPA, 500  $\mu$ M), significantly restored autophagy in both seam cells (a) and intestinal cells (b) in *fat-7(wa36)* mutants at 15°C. These results are means  $\pm$  SD of three independent experiments (n = 30-34 worms per experiment). \*\*\*  $P < 0.001$  versus vehicle. ns, not significant.  $p$ -Values throughout were calculated using a one-way ANOVA followed by a Student-Newman-Keuls test.

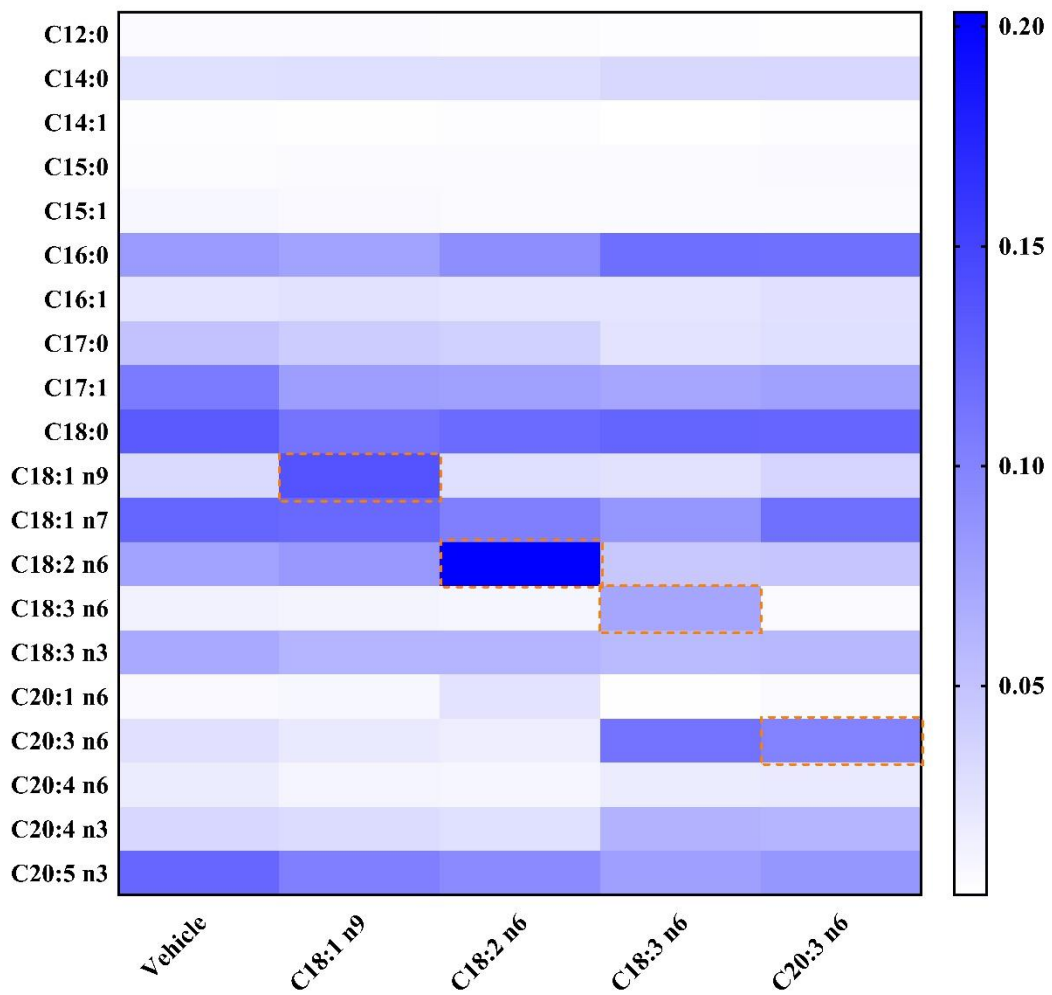

**Supplementary Figure 12. Effect of fatty acid supplementation on fatty acid composition in *fat-7(wa36)* mutants at 15°C.** The fatty acid composition was detected by GC/MS after supplementation with oleic acid (OA, C18:1n9, 100  $\mu$ M), linoleic acid (LA, C18:2n6, 200  $\mu$ M),  $\gamma$ -linolenic acid (GLA, C18:3n6, 500  $\mu$ M), or dihomo- $\gamma$ -linolenic acid (DGLA, C20:3n6, 500  $\mu$ M). Each fatty acid was expressed as a percentage of the total fatty acids.

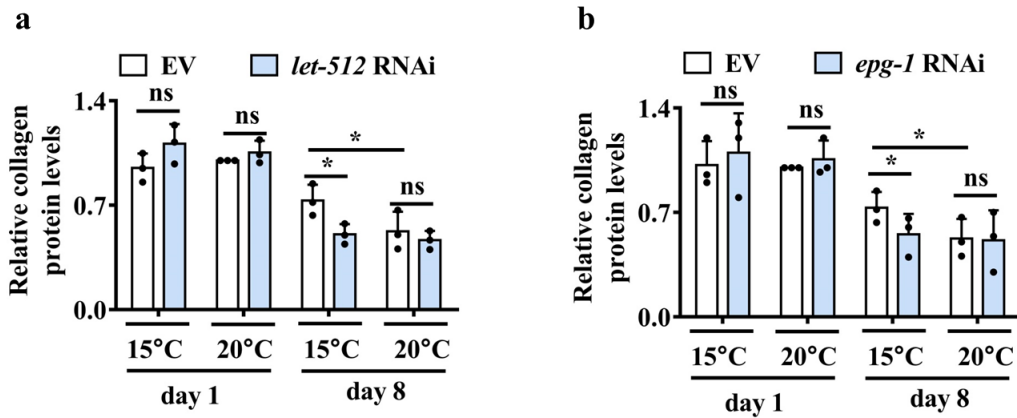

**Supplementary Figure 13. Knockdown of *let-512* and *epg-1* by RNAi significantly reduces the collagen levels in eight-day-old worms at 15°C.** (a and b) The relative collagen levels in worms. The data are expressed as percent of control (the value of one-day-old worms at 20°C). (a) *let-512* RNAi; (b) *epg-1* RNAi. EV, empty vector. \* $P < 0.05$ , eight-day-old worms with EV at 15°C versus eight-day-old worms with EV at 20°C, or eight-day-old worms with *let-512* and *epg-1* RNAi at 15°C. ns, not significant. These results are means  $\pm$  SD ( $n = 3$ ).  $p$ -Values throughout were calculated using a one-way ANOVA followed by a Student-Newman-Keuls test.

**Fig.1b**

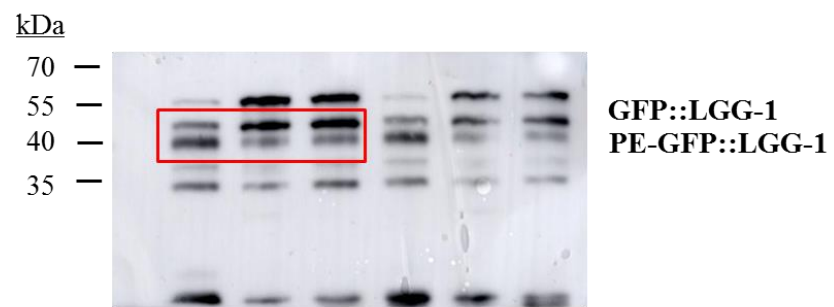

**Fig.1f**

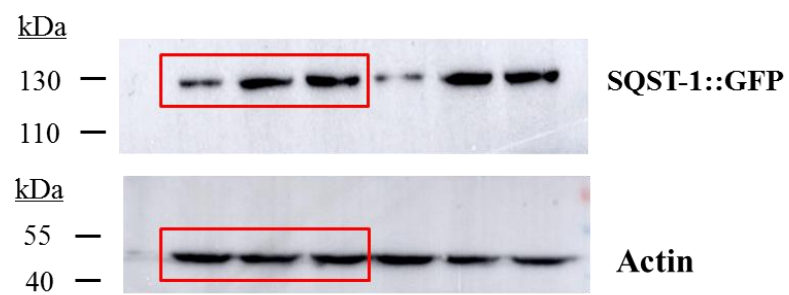

**Supplementary Figure 14. Full scans for Figure 1b and f.**

**Supplementary Table 1 The percentages of the total lifespan of *C. elegans* strains**

| Strain              | Temp | Max lifespan | Fraction of lifespan |                     | Figure in the text |
|---------------------|------|--------------|----------------------|---------------------|--------------------|
|                     |      |              | 1 <sup>th</sup> day  | 8 <sup>th</sup> day |                    |
| WT+EV               | 15°C | 32           | 3.13%                | 25.00%              | Fig.2d-f           |
|                     | 20°C | 28           | 3.57%                | 28.57%              |                    |
| <i>bec-1</i> RNAi   | 15°C | 26           | 3.85%                | 30.77%              | Fig.S3a-c          |
|                     | 20°C | 26           | 3.85%                | 30.77%              | Fig.S4a-f          |
| <i>let-512</i> RNAi | 15°C | 22           | 4.55%                | 36.36%              | Fig.5g             |
|                     | 20°C | 26           | 3.85%                | 30.77%              | Fig.S13a,b         |
| <i>epg-1</i> RNAi   | 15°C | 24           | 4.17%                | 33.33%              |                    |
|                     | 20°C | 28           | 3.57%                | 25.57%              |                    |
