# Supplementary material for: Adiponectin receptor PAQR-2 signaling senses low temperature to promote C. elegans longevity by regulating autophagy
Source: PubMed Central journal article supplement (PMC6565724; doi:10.1038/s41467-019-10475-8), 2019-06-13
Supplement: 41467_2019_10475_MOESM2_ESM.pdf [file 41467_2019_10475_MOESM2_ESM.pdf]

## Description of Additional Supplementary Files

**File Name:** Supplementary Data 1

**Description:** Summary of lifespan experiments with *C. elegans* strains.
